# Supplementary material for: Labor force participation and secondary education of gender inequality index (GII) associated with healthy life expectancy (HLE) at birth
Source: Springer Nature journal article supplement (doi:10.1186/s12939-014-0106-2), 2014-11-17
Supplement: MOESM5 [file 9762422]

Table 3. Prediction variables for HLE (MF), HLE (M) and HLE (F)

| Predictions variable |          | Coefficient | T-value | P-value | R <sup>2</sup> |
|----------------------|----------|-------------|---------|---------|----------------|
| HLE (MF)             | PLSE (F) | 0.221       | 11.94   | 0.001   | 0.532          |
|                      | LFPR (F) | -0.131      | -3.71   | 0.001   |                |
| HLE (M)              | PLSE (F) | 0.205       | 11.07   | 0.001   | 0.498          |
|                      | LFPR (F) | -0.128      | -3.65   | 0.001   |                |
| HLE (F)              | PLSE (F) | 0.237       | 12.38   | 0.001   | 0.552          |
|                      | LFPR (F) | -0.141      | -3.88   | 0.001   |                |

\*HLE: Healthy life expectancy at birth

\*PLSE: Population with at least secondary education (% ages 25 and older)

\*LFPR: Labour force participation rate (% ages 15 and older)

\*MF: Male and Female, \*M: Male, \*F: Female
